# Supplementary material for: A 1-Year Prospective French Nationwide Study of Emergency Hospital Admissions in Children and Adults with Primary Immunodeficiency
Source: Springer Nature journal article supplement (doi:10.1007/s10875-019-00658-9), 2019-08-10
Supplement: MOESM3 [file 17056280]

**Supplemental Table 3 – Characteristics of the 16 HSCT recipients with an underlying PID**

|  | ***Total***  ***n=16 (%)*** | ***Children***  ***n=13 (%)*** | ***Adults***  ***n=3 (%)*** |
| --- | --- | --- | --- |
| **Type of PID**  **T-cell deficiency**  Combined immunodeficiency  HLA II deficiency  Omenn syndrome  **Immune dysregulation**  Familial hemophagocytic lymphohistiocytosis  Immunodysregulation polyendocrinopathy enteropathy X-linked  Griscelli syndrome, type 2  **Phagocytic disorder**  Chronic granulomatous disease  Leukocyte adhesion deficiency  **Other PID well defined**  Dyskeratosis congenita  **Innate immunity deficiency**  (TLR/NFkB*) | **7 (43.7)**  4  2  1  **4 (25.0)**  2  1  1  **2 (12.5)**  1  1  **2 (12.5)**  2  **1 (6.3)**  1 | **6 (46.1)**  3  2  1  **4 (30.7)**  2  1  1  **2 (15.4)**  1  1  **0 (0)**  0  **1 (7.7)**  1 | **1 (33)**  1  -  -  -  -  -  -  -  -  -  -  -  **2 (67)**  2 |
| **Age at HSCT**  median (range) | 1.5 (0.2-12.3) | 1.3 (0.2-9.3) | 10.6 (0.4-12.3) |
| **Time between HSCT and hospital admission (years)**  median (range) | 1.5 (0.35-30) | 1.3 (0.3-4.4) | 6.6 (5.8-30) |
| **Number of hospital admissions**  median (range) | 2 (1-5) | 2 (1-5) | 1 (1-2) |
| **Length of hospital stay (days)**  median (range) | n=30**  11.5 | n=26*  11.5 (2-165) | n=4*  7.5 (2-20) |
| **Immunoglobulin replacement therapy**  Intravenous  Subcutaneous | **11 (68.8)**  11  0 | **9 (69.2)**  9  0 | **2 (67)**  2  0 |
| **Anti-infectious prophylaxis**  Antibacterial  Antifungal  Antiviral | **16 (100)**  7  6  3 | **13 (100)**  5  6  2 | **3 (100)**  2  0  1 |
| **Immunosuppressive treatments**  Corticosteroids Alone  Corticosteroids And Others  Other  None | **7 (43.8)**  1  3  3  8 | **6 (46.2)**  1  2  3  6 | **1 (33)**  **-**  1  -  2 |
| **Medical history**  Severe infections  Central venous catheter  Bronchiectasis  Splenectomy  Other | 12 (75)  6 (37.5)  2 (12.5)  1 (6.3)  4 (25) | 10 (76.9)  5 (38.5)  1 (7.7)  1 (7.7)  4 (30.8) | 2 (67)  1 (33)  1 (33)  -  - |
| **Diagnosis***  **Infectious**  Pulmonary  Fever with no documentation  Digestive  Bacteremia  Miscellaneous (retinitis and flu)  **Non-infectious**  Hematologic  Miscellaneous (thyroiditis and retinopathy) | **30**  **21 (70)**  10 (33)  4 (13.3)  2 (6.7)  3 (10)  2 (6.7)  **9 (30.0)**  6 (20)  3 (10) | **26**  **19 (73)**  8 (30.8)  4 (15.4)  2 (7.7)  3 (11.5)  2 (7.7)  **7 (26.9)**  5 (19.2)  2 (7.7) | **4**  **2 (50)**  2 (50)  **-**  **-**  **-**  **-**  **2 (50)**  1 (25)  1 (25) |
| **Deaths (**terminal respiratory insufficiency) | 1 | 0 (0) | 1 (25) |

*Toll-like receptor – nuclear factor-kappa B

** Some patients had more than one episode.
