# Supplementary material for: A 1-Year Prospective French Nationwide Study of Emergency Hospital Admissions in Children and Adults with Primary Immunodeficiency
Source: Springer Nature journal article supplement (doi:10.1007/s10875-019-00658-9), 2019-08-10
Supplement: MOESM4 [file 17056280]

**Supplemental Table 4 – Characteristics of the 17 splenectomized patients with PID***

| ***Splenectomized patients*** | ***Total***  ***n=17*** | ***Aged 15 or under***  ***n=3*** | ***Aged 16 or over***  ***n=14*** |
| --- | --- | --- | --- |
| **Age (years)**  median (range) | 21.2 (4.7-73.9) | 9.7 (4.7-11.3) | 31.6 (16.6-73.9) |
| **Age at splenectomy (years)**  median (range) | 18.4 (1.7-57.3) | 3.2 (1.7-8.6) | 24.6 (2.7-57.3) |
| **Time between splenectomy and hospital admission (years)**  median (range) | 6.3 (0-16.9) | 3.2 (2.7-6.0) | 6.5 (0-16.9) |
| **Deaths**  Age (median, range) | 3 (17.6)  21.4 (20.9-74.3) | 0 (0)  - | 3 (21.4)  21.4 (20.9-74.3) |
| **Diagnosis****  **Infectious**  pulmonary  digestive  neurologic  severe sepsis/shock  skin and mucosa  Other (Epstein-Barr Virus, etc.)  **Non-infectious**  neurologic  hematologic  miscellaneous | **23**  **17 (73.9)**  3  3  1  4  2  4  **7 (26.3)**  2  3  2 | **6**  **4 (67)**  1  -  -  1  2  -  **3 (50)**  2  -  1 | **17**  **13 (76.5)**  2  3  1  3  -  4  **4 (23.5)**  -  3  1 |

**7* with common variable immunodeficiency; 3 with Wiskott-Aldrich syndrome, 2 with autoimmune lymphoproliferative syndrome, 2 with Defined Ig G, 1 with autosomal recessive chronic granulomatous disease, 1 with combined immunodeficiency, 1 with hyper-IgM syndrome

** Some patients had more than one episode
